# Supplementary material for: Biochemical and Structural Diversification of C4 Photosynthesis in Tribe Zoysieae (Poaceae)
Source: MDPI journal article supplement (doi:10.3390/plants12234049), 2023-11-30
Supplement: s1 [file s1]

## Biochemical and Structural Diversification of C<sub>4</sub> Photosynthesis in Tribe Zoysieae (Poaceae)

Nuria K. Koteyeva <sup>1,\*</sup>, Elena V. Voznesenskaya <sup>1,\*</sup>, Varsha S. Pathare <sup>2</sup>, Tatyana A. Borisenko <sup>1,3</sup>, Peter M. Zhurbenko <sup>4</sup>, Grigory A. Morozov <sup>5</sup> and Gerald E. Edwards <sup>6</sup>

<sup>1</sup> Laboratory of Anatomy and Morphology, Komarov Botanical Institute of Russian Academy of Sciences, 197376 St. Petersburg, Russia.

<sup>2</sup> Institute for Genomic Biology, University of Illinois at Urbana-Champaign, Champaign, IL 61801, USA; varsha.pathare@wsu.edu

<sup>3</sup> Faculty of Biology, St. Petersburg State University, 199034 St. Petersburg, Russia; st075629@student.spbu.ru

<sup>4</sup> Laboratory of Biosystematics and Cytology, Komarov Botanical Institute of Russian Academy of Sciences, 197376 St. Petersburg, Russia; pj\_28@mail.ru

<sup>5</sup> Chair of Medical Biology, North-Western State Medical University named after I.I. Mechnikov, 191015 St. Petersburg, Russia; dartost1@rambler.ru

<sup>6</sup> School of Biological Sciences, Washington State University, Pullman, WA 99164-4236, USA; edwardsg@wsu.edu

Supplementary Figure S1. A. Representative Western blots for three decarboxylases from total proteins extracted from leaves of Zoysieae grass species, and representative membrane stained with Ponceau S after proteins (20 µg per lane) transfer to nitrocellulose membrane and before immunoblotting. B. Additional representative blots to show all species used in study. Blots were probed with antibodies raised against PEP-CK, NAD-ME, and NADP-ME. Reference species for NAD-ME is *S. airoides*, for NADP-ME is *Zea mays*, for PEP-CK is *S. anglicus*. The molecular mass is indicated to the sides of the blots. Where indicated, grass species are marked that are not included in the current paper, but they are retained to avoid modifying the blots.

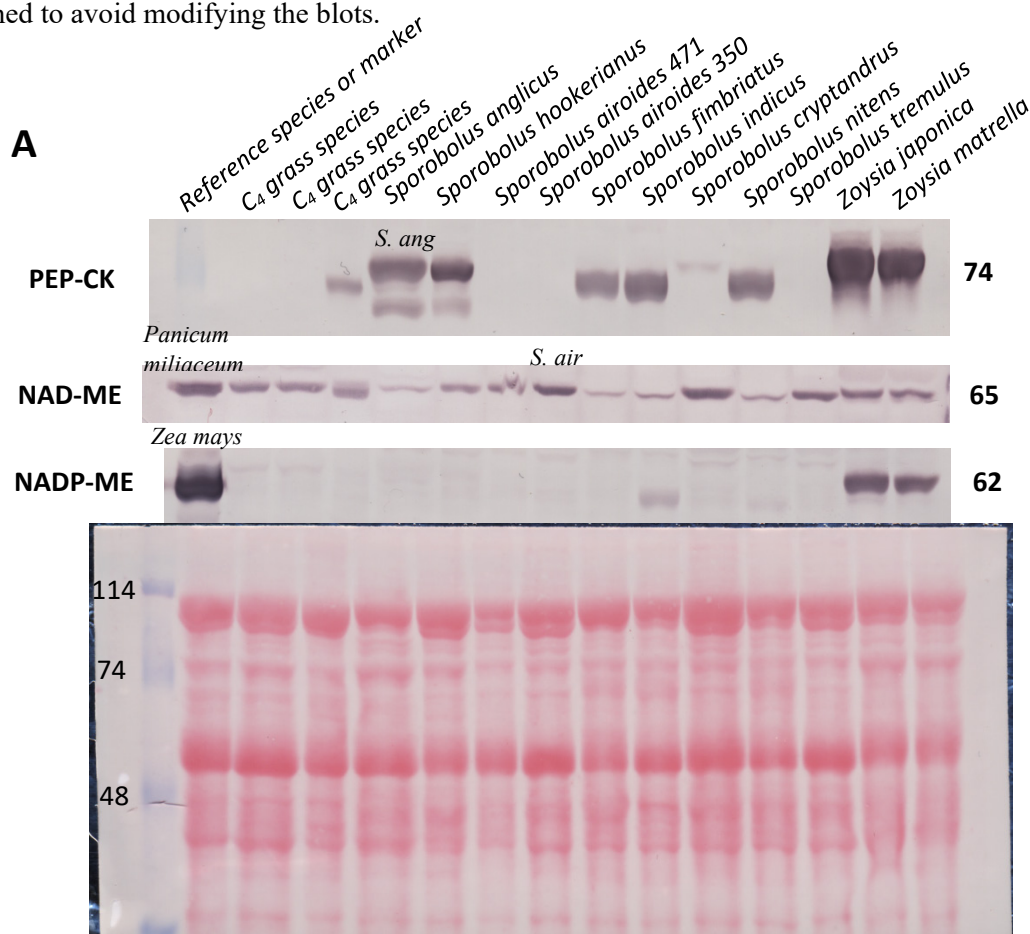

**B**

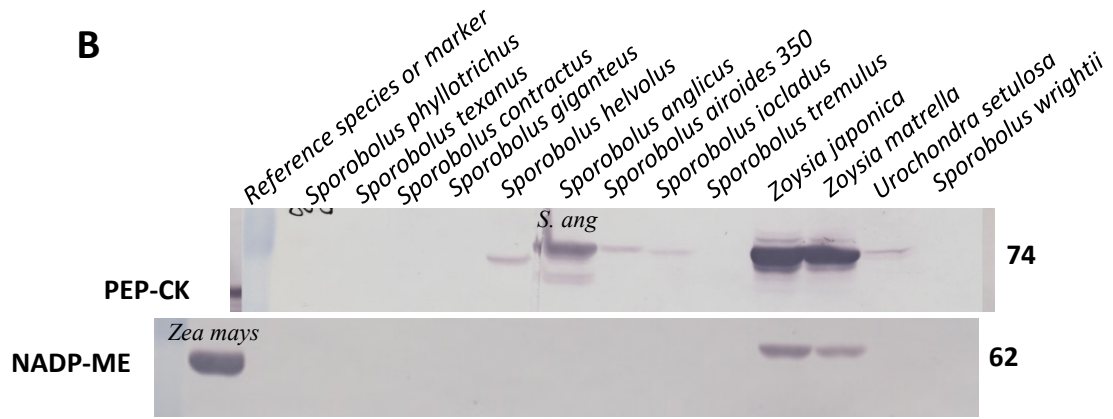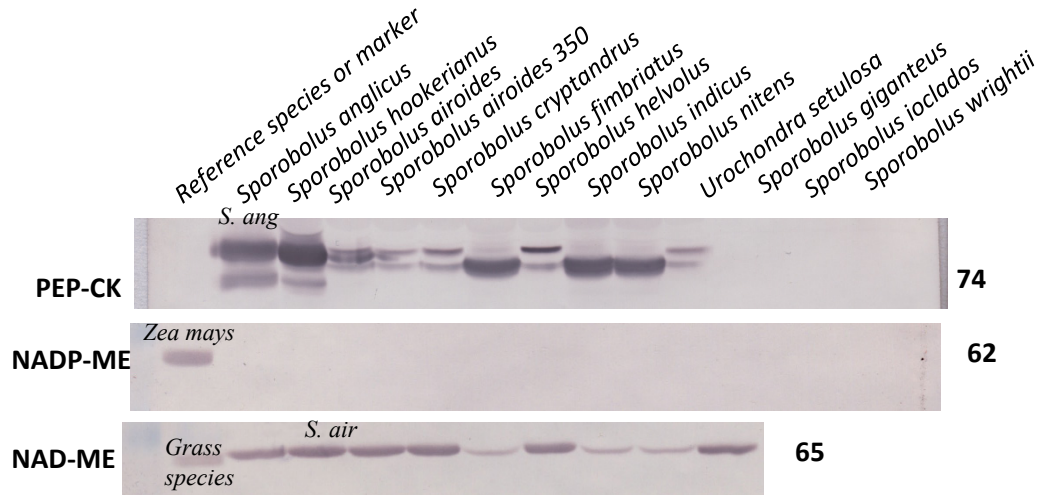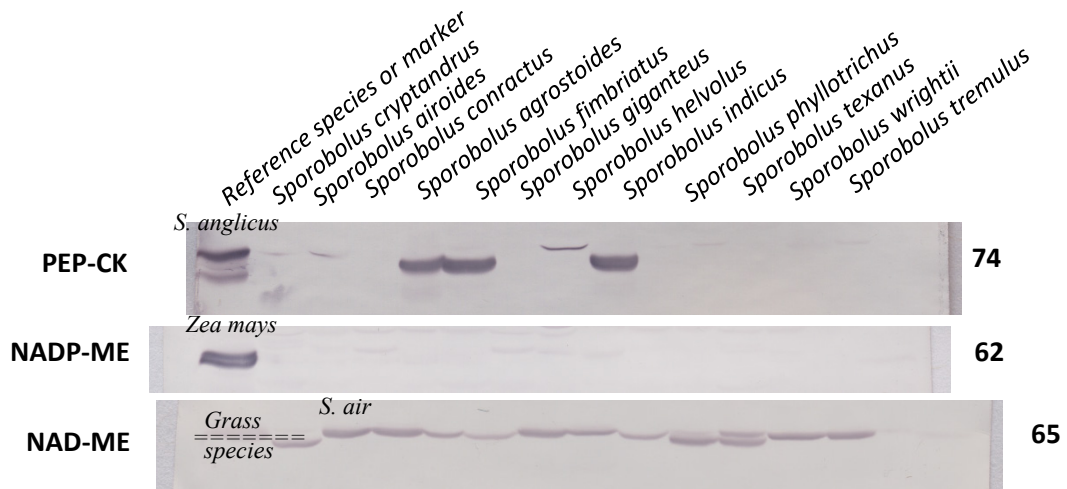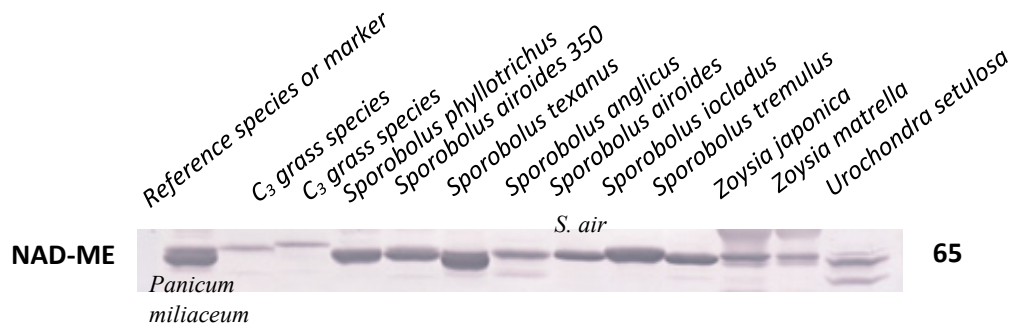

Supplementary Figure S2. Light and electron microscopy images of leaf cross-sections showing organelle positioning in grasses of different biochemical subtypes: A, B. *Sporobolus texanus*, NAD-ME species with centripetal position (towards the vascular bundle) of organelles in BS cells; *Sporobolus agrostoides*, PEP-CK species with centrifugal position (towards the mesophyll cells) of organelles in BS cells. BS, bundle sheath; Ch, chloroplast; M, mesophyll cells; V, vacuole; VB, vascular bundle. Scales: A, C, 50  $\mu$ m; B, D, 10  $\mu$ m.

### *Sporobolus texanus*

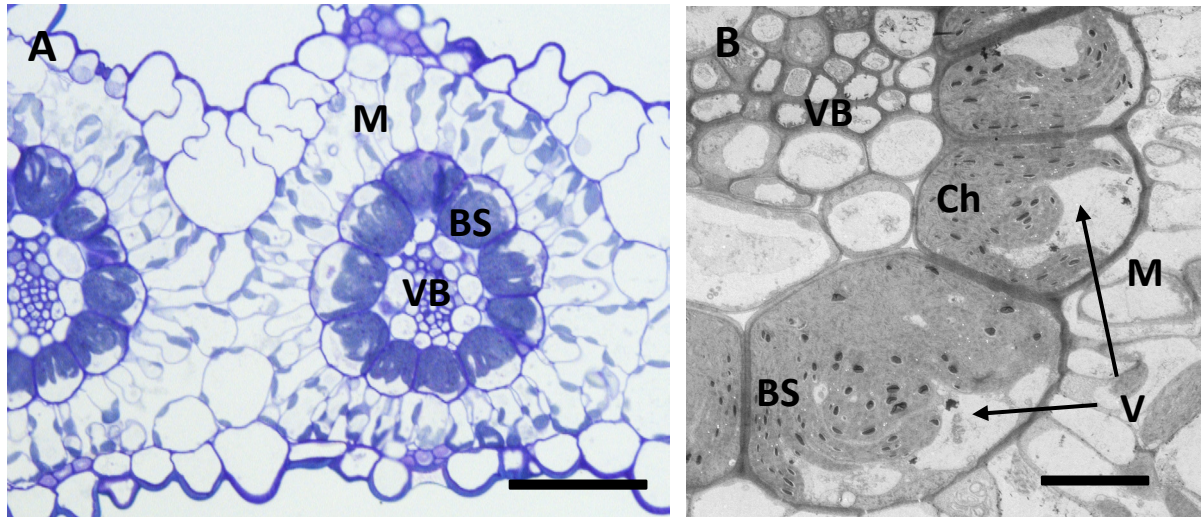

### *Sporobolus agrostoides*

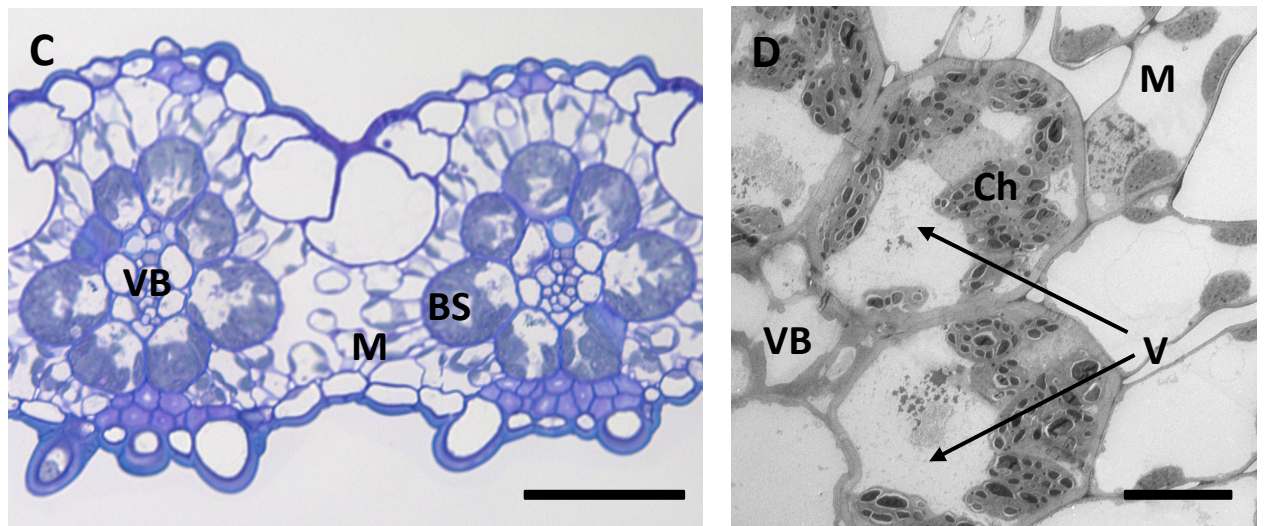

**Supplementary Table S1. List of Zoysieae species studied, source of seeds, and GBIF records used in analyses of habitat MAP and MAT.**

| N  | Species name                                                                                                      | Source of seeds<br>(USDA<br>accession<br>number or<br>collection area) | Number of<br>GBIF records | GBIF citation                                                                                                                                  |
|----|-------------------------------------------------------------------------------------------------------------------|------------------------------------------------------------------------|---------------------------|------------------------------------------------------------------------------------------------------------------------------------------------|
| 1  | <i>Sporobolus airoides</i> (Torr.)<br>Torr.                                                                       | W6 44471<br>W6 35350                                                   | 328                       | GBIF.org (19 November 2023) GBIF<br>Occurrence Download<br><a href="https://doi.org/10.15468/dl.6gg698">https://doi.org/10.15468/dl.6gg698</a> |
| 2  | <i>Sporobolus agrostoides</i><br>Chiov (under syn. name <i>S.</i><br><i>filipes</i> )                             | PI 209189                                                              | Not<br>available          |                                                                                                                                                |
| 3  | <i>Sporobolus anglicus</i> (C.E.<br>Hubb.) P.M. Peterson &<br>Saarela (former <i>Spartina</i><br><i>anglica</i> ) | collected at<br>Livingston Bay,<br>WA, USA                             | 20572                     | GBIF.org (19 November 2023) GBIF<br>Occurrence Download<br><a href="https://doi.org/10.15468/dl.bgsxa3">https://doi.org/10.15468/dl.bgsxa3</a> |
| 4  | <i>Sporobolus contractus</i><br>Hitche.                                                                           | PI 241073                                                              | 82                        | GBIF.org (19 November 2023) GBIF<br>Occurrence Download<br><a href="https://doi.org/10.15468/dl.9d7kw4">https://doi.org/10.15468/dl.9d7kw4</a> |
| 5  | <i>Sporobolus cryptandrus</i><br>(Torr.) A. Gray                                                                  | PI 676246                                                              | 789                       | GBIF.org (19 November 2023) GBIF<br>Occurrence Download<br><a href="https://doi.org/10.15468/dl.b46x9y">https://doi.org/10.15468/dl.b46x9y</a> |
| 6  | <i>Sporobolus fimbriatus</i><br>(Trin.) Nees                                                                      | PI 185576                                                              | 27                        | GBIF.org (19 November 2023) GBIF<br>Occurrence Download<br><a href="https://doi.org/10.15468/dl.v3bhmu">https://doi.org/10.15468/dl.v3bhmu</a> |
| 7  | <i>Sporobolus giganteus</i> Nash                                                                                  | W6 44479                                                               | 16                        | GBIF.org (19 November 2023) GBIF<br>Occurrence Download<br><a href="https://doi.org/10.15468/dl.xrezvd">https://doi.org/10.15468/dl.xrezvd</a> |
| 8  | <i>Sporobolus helvolus</i> (Trin.)<br>T. Durand & Schinz                                                          | PI 219620                                                              | 175                       | GBIF.org (19 November 2023) GBIF<br>Occurrence Download<br><a href="https://doi.org/10.15468/dl.x8cvpz">https://doi.org/10.15468/dl.x8cvpz</a> |
| 9  | <i>Sporobolus hookerianus</i><br>P.M. Peterson & Saarela<br>(former <i>Spartina gracilis</i> )                    | W6 29998                                                               | 108                       | GBIF.org (19 November 2023) GBIF<br>Occurrence Download<br><a href="https://doi.org/10.15468/dl.5hgycn">https://doi.org/10.15468/dl.5hgycn</a> |
| 10 | <i>Sporobolus indicus</i> (L.)<br>R.Br.                                                                           | PI 203864                                                              | 14865                     | GBIF.org (19 November 2023) GBIF<br>Occurrence Download<br><a href="https://doi.org/10.15468/dl.9wtudr">https://doi.org/10.15468/dl.9wtudr</a> |
| 11 | <i>Sporobolus iocladius</i> (Nees<br>ex Trin.) Nees                                                               | collected in<br>Pakistan,<br>provided by Dr.                           | Not<br>available          |                                                                                                                                                |

|    |                                                 |                                                                                             |                  |                                                                                                                                                |
|----|-------------------------------------------------|---------------------------------------------------------------------------------------------|------------------|------------------------------------------------------------------------------------------------------------------------------------------------|
|    |                                                 | Salman Gulzar<br>(University of<br>Karachi)                                                 |                  |                                                                                                                                                |
| 12 | <i>Sporobolus nitens</i> Stent                  | PI 208147                                                                                   | 13               | GBIF.org (19 November 2023) GBIF<br>Occurrence Download<br><a href="https://doi.org/10.15468/dl.jgus9y">https://doi.org/10.15468/dl.jgus9y</a> |
| 13 | <i>Sporobolus phyllotrichus</i><br>Hochst.      | PI 226098                                                                                   | Not<br>available |                                                                                                                                                |
| 14 | <i>Sporobolus texanus</i> Vasey                 | PI 478836                                                                                   | 3                | GBIF.org (19 November 2023) GBIF<br>Occurrence Download<br><a href="https://doi.org/10.15468/dl.nf5ukb">https://doi.org/10.15468/dl.nf5ukb</a> |
| 15 | <i>Sporobolus tremulus</i><br>(Willd.) Kunth    | collected in<br>Pakistan,<br>provided by Dr.<br>Salman Gulzar<br>(University of<br>Karachi) | Not<br>available |                                                                                                                                                |
| 16 | <i>Sporobolus wrightii</i> Munro<br>ex Scribn.  | W6 54414                                                                                    | 99               | GBIF.org (19 November 2023) GBIF<br>Occurrence Download<br><a href="https://doi.org/10.15468/dl.2z4tp3">https://doi.org/10.15468/dl.2z4tp3</a> |
| 17 | <i>Urochondra setulosa</i><br>(Trin.) C.E. Hubb | collected in<br>Pakistan,<br>provided by Dr.<br>Salman Gulzar<br>(University of<br>Karachi) | 6                | GBIF.org (19 November 2023) GBIF<br>Occurrence Download<br><a href="https://doi.org/10.15468/dl.gjad7c">https://doi.org/10.15468/dl.gjad7c</a> |
| 18 | <i>Zoysia matrella</i> (L.) Merr.               | PI 231146                                                                                   | 350              | GBIF.org (19 November 2023) GBIF<br>Occurrence Download<br><a href="https://doi.org/10.15468/dl.qk89w2">https://doi.org/10.15468/dl.qk89w2</a> |
| 19 | <i>Zoysia japonica</i> Steud.                   | PI 231389                                                                                   | 810              | GBIF.org (19 November 2023) GBIF<br>Occurrence Download<br><a href="https://doi.org/10.15468/dl.hqamdq">https://doi.org/10.15468/dl.hqamdq</a> |



Supplementary Table S2. Leaf anatomical traits related to photosynthesis. BS, bundle sheath; SDaba, abaxial stomata density; SDada, adaxial stomata density; CW, cell wall; M, mesophyll. NAD-ME species are marked by orange, PEP-CK species are marked by blue. Different letters indicate significant differences between species in a column at  $P \leq 0.05$ .

| Species                    | Leaf thickness<br>(minimal)*,<br>$\mu\text{m}$ | SDaba,<br>$\# \text{mm}^{-2}$ | SDada,<br>$\# \text{mm}^{-2}$ | Stomata size,<br>abaxial,<br>$\mu\text{m}$ | Stomata size,<br>adaxial,<br>$\mu\text{m}$ | CW thickness      |                    |
|----------------------------|------------------------------------------------|-------------------------------|-------------------------------|--------------------------------------------|--------------------------------------------|-------------------|--------------------|
|                            |                                                |                               |                               |                                            |                                            | BS, $\mu\text{m}$ | M, $\mu\text{m}$   |
| <i>S. airoides</i>         | 180.8 $\pm$ 4.46a                              | 102.3 $\pm$ 6.27h             | 140.1 $\pm$ 10.16d            | 31.6 $\pm$ 0.82a                           | 20.6 $\pm$ 0.64b                           | 1.05 $\pm$ 0.05a  | 0.1 $\pm$ 0.002b   |
| <i>S. contractus</i>       | 117.1 $\pm$ 1.84c                              | 181.4 $\pm$ 8.21ef            | 208.6 $\pm$ 3.93c             | 22.7 $\pm$ 0.38b                           | 22.6 $\pm$ 0.25b                           | 0.82 $\pm$ 0.03b  | 0.16 $\pm$ 0.01a   |
| <i>S. cryptandrus</i>      | 95.8 $\pm$ 4.08de                              | 85.7 $\pm$ 5.10i              | 125.2 $\pm$ 2.59e             | 30.9 $\pm$ 0.61a                           | 28.6 $\pm$ 0.75a                           | 0.35 $\pm$ 0.01de | 0.10 $\pm$ 0.01c   |
| <i>S. giganteus</i>        | 131.4 $\pm$ 2.52c                              | 105.3 $\pm$ 4.11h             | 130.7 $\pm$ 5.17e             | 30.7 $\pm$ 0.45a                           | 31.0 $\pm$ 0.35a                           | 0.47 $\pm$ 0.06d  | 0.08 $\pm$ 0.004d  |
| <i>S. helvolus</i>         | 132.3 $\pm$ 5.46bc                             | 194.5 $\pm$ 8.02de            | 170.7 $\pm$ 6.26d             | 17.6 $\pm$ 0.66b                           | 16.2 $\pm$ 0.66c                           | 0.29 $\pm$ 0.02e  | 0.06 $\pm$ 0.003e  |
| <i>S. ioclados</i>         | 201.0 $\pm$ 4.62a                              | 110.8 $\pm$ 3.38h             | 141.5 $\pm$ 2.53e             | 27.7 $\pm$ 0.54a                           | 23.5 $\pm$ 0.36b                           | 0.39 $\pm$ 0.01d  | 0.096 $\pm$ 0.002  |
| <i>S. phyllotrichus</i>    | 81.4 $\pm$ 1.96e                               | 119.7 $\pm$ 8.43gh            | 209.1 $\pm$ 9.17c             | 18.1 $\pm$ 0.68b                           | 18.2 $\pm$ 0.41c                           | 0.96 $\pm$ 0.02a  | 0.16 $\pm$ 0.01a   |
| <i>S. texanus</i>          | 130.2 $\pm$ 3.24b                              | 222.8 $\pm$ 14.46c            | 291.5 $\pm$ 11.46b            | 22.6 $\pm$ 0.40b                           | 21.8 $\pm$ 0.36b                           | 0.63 $\pm$ 0.02c  | 0.11 $\pm$ 0.01c   |
| <i>S. tremulus</i>         | 103.5 $\pm$ 2.41d                              | 156.1 $\pm$ 12.92f            | 313.9 $\pm$ 10.05b            | 17.9 $\pm$ 0.21b                           | 15.8 $\pm$ 0.46                            | 0.88 $\pm$ 0.03b  | 0.16 $\pm$ 0.01a   |
| <i>S. wrightii</i>         | 88.6 $\pm$ 2.29e                               | 180.4 $\pm$ 6.50ef            | 187.2 $\pm$ 4.25c             | 23.8 $\pm$ 0.50b                           | 23.4 $\pm$ 0.31b                           | 0.41 $\pm$ 0.02d  | 0.09 $\pm$ 0.002cd |
| <i>U. setulosa</i>         | 122.2 $\pm$ 3.53bc                             | 341.4 $\pm$ 5.65a             | 168.6 $\pm$ 2.53d             | 21.0 $\pm$ 0.38b                           | 22.2 $\pm$ 0.51b                           | 0.7 $\pm$ 0.02c   | 0.08 $\pm$ 0.02d   |
| Average for NAD-ME species | 125.9ns                                        | 163.7ns                       | 189.7ns                       | 24.1ns                                     | 22.2ns                                     | 0.63ns            | 0.11ns             |
| <i>S. anglicus</i>         | 131.0 $\pm$ 4.51bc                             | 0.7 $\pm$ 0.01j               | 168.4 $\pm$ 5.23d             | 27.6 $\pm$ 0.39a                           | 32.4 $\pm$ 0.38a                           | 0.75 $\pm$ 0.02bc | 0.09 $\pm$ 0.003c  |
| <i>S. agrostoides</i>      | 91.2 $\pm$ 2.23e                               | 161.9 $\pm$ 11.15f            | 127.5 $\pm$ 4.82e             | 25.3 $\pm$ 0.76ab                          | 24.1 $\pm$ 0.56ab                          | 0.63 $\pm$ 0.01c  | 0.15 $\pm$ 0.01a   |

|                            |              |              |               |             |             |             |             |
|----------------------------|--------------|--------------|---------------|-------------|-------------|-------------|-------------|
| <i>S. fimbriatus</i>       | 104.7±3.23d  | 160.7±9.83f  | 190.5±15.27c  | 26.2±0.47a  | 17.4±0.31bc | 0.71±0.02c  | 0.14±0.00bc |
| <i>S. hookerianus</i>      | 110.5±2.23cd | 129.1±6.32g  | 160.1±6.62d   | 27.0±0.50a  | 20.5±0.56b  | 0.6±0.02c   | 0.12±0.02c  |
| <i>S. indicus</i>          | 86.8±1.40e   | 100.1±2.21h  | 140.1±11.58de | 29.2±0.46a  | 24.8±0.39a  | 0.75±0.02bc | 0.11±0.01c  |
| <i>S. nitens</i>           | 87.1±3.23e   | 101.0±2.41hi | 133.5±6.51e   | 27.6±0.50a  | 24.3±0.25a  | 0.43±0.01d  | 0.16±0.01ab |
| <i>Z. japonica</i>         | 91.7±1.81e   | 203.7±5.62cd | 410.9±11.21a  | 16.9±0.41c  | 13.2±0.30d  | 0.48±0.02d  | 0.11±0.01c  |
| <i>Z. matrella</i>         | 86.8±2.69e   | 270.5±8.70b  | 455.3±11.03a  | 18.2±0.25bc | 15.6±0.24cd | 0.44±0.01d  | 0.17±0.01a  |
| Average for PEP-CK species | 115.0        | 154.6        | 203.2         | 24.3        | 21.9        | 0.62        | 0.12        |

\*Leaf thickness measured between vascular bundles on leaf cross section

ns indicates non-significant differences between NAD-ME and PEP-CK groups at  $p > 0.1$

Supplementary Table S3. List of Zoysieae species with suggested C<sub>4</sub> biochemical subtype based on different methods with references. NAD-ME species are marked by orange, PEP-CK species are marked by blue.

|    | Zoysieae species                                                       | Biochemical subtype | References for subtype description based on    |                                                                        |                              |
|----|------------------------------------------------------------------------|---------------------|------------------------------------------------|------------------------------------------------------------------------|------------------------------|
|    |                                                                        |                     | All three decarboxylases: activity or Westerns | Only PEP-CK – activity, or Western, or transcripts, or <i>pck</i> gene | Anatomy                      |
| 1  | <i>Sporobolus airoides</i>                                             | NAD-ME              | [4]<br><b>Current study</b>                    |                                                                        | <b>Current study</b>         |
| 2  | <i>Sporobolus africanus</i>                                            | PEP-CK              | [16]                                           | [36]                                                                   | [37]                         |
| 3  | <i>Sporobolus agrostoides</i> (syn. <i>S. filipes</i> )                | PEP-CK              | <b>Current study</b>                           |                                                                        | <b>Current study</b>         |
| 4  | <i>Sporobolus alterniflorus</i> (former <i>Spartina alterniflora</i> ) | PEP-CK              | [9]                                            |                                                                        | [25]                         |
| 5  | <i>Sporobolus anglicus</i>                                             | PEP-CK              | [9,12]<br><b>Current study</b>                 | [36]                                                                   | [25]<br><b>Current study</b> |
| 6  | <i>Sporobolus bakeri</i> (former <i>Spartina bakeri</i> )              | PEP-CK              |                                                |                                                                        | [25]                         |
| 7  | <i>Sporobolus caroli</i>                                               | NAD-ME              | [16]                                           |                                                                        | [37]                         |
| 8  | <i>Sporobolus contractus</i>                                           | NAD-ME              | <b>Current study</b>                           |                                                                        | <b>Current study</b>         |
| 9  | <i>Sporobolus creber</i>                                               | PEP-CK              | [16]                                           |                                                                        | [37]                         |
| 10 | <i>Sporobolus cryptandrus</i>                                          | NAD-ME              | [4]<br><b>Current study</b>                    |                                                                        | <b>Current study</b>         |
| 11 | <i>Sporobolus cynosuroides</i> (former <i>Spartina cynosuroides</i> )  | PEP-CK              |                                                |                                                                        | [25]                         |
| 12 | <i>Sporobolus densiflorus</i> (former <i>Spartina densiflora</i> )     | PEP-CK              |                                                |                                                                        | [25]                         |
| 13 | <i>Sporobolus elongatus</i>                                            | PEP-CK              | [16]                                           |                                                                        | [37]                         |
| 14 | <i>Sporobolus festivus</i>                                             | PEP-CK              |                                                | [36]                                                                   | [26]                         |
| 15 | <i>Sporobolus fimbriatus</i>                                           | PEP-CK              | [5]<br><b>Current study</b>                    |                                                                        | <b>Current study</b>         |
| 16 | <i>Sporobolus foliosus</i> (former <i>Spartina foliosa</i> )           | PEP-CK              |                                                |                                                                        | [25]                         |
| 17 | <i>Sporobolus giganteus</i>                                            | NAD-ME              | <b>Current study</b>                           |                                                                        | <b>Current study</b>         |
| 18 | <i>Sporobolus helvolus</i>                                             | NAD-ME              | <b>Current study</b>                           |                                                                        | [26]<br><b>Current study</b> |
| 19 | <i>S. hookerianus</i> (former <i>Spartina gracilis</i> )               | PEP-CK              | <b>Current study</b>                           |                                                                        | [25]<br><b>Current study</b> |
| 20 | <i>Sporobolus indicus</i>                                              | PEP-CK              | <b>Current study</b>                           | [28]                                                                   | <b>Current study</b>         |
| 21 | <i>Sporobolus iocladius</i> (= <i>Sporobolus arabicus</i> )            | NAD-ME              | <b>Current study</b>                           |                                                                        | <b>Current study</b>         |
| 22 | <i>Sporobolus jacquemontii</i>                                         | PEP-CK              | [16]                                           | [28]                                                                   | [37]                         |



|    |                                                                                                       |        |                              |      |                      |
|----|-------------------------------------------------------------------------------------------------------|--------|------------------------------|------|----------------------|
| 23 | <i>Sporobolus maritimus</i><br>(former <i>Spartina maritima</i> )                                     | PEP-CK |                              | [36] |                      |
| 24 | <i>Sporobolus michauxianus</i><br>(former <i>Spartina pectinate</i> )                                 | PEP-CK |                              |      | [25]                 |
| 25 | <i>Sporobolus microprotus</i>                                                                         | NAD-ME |                              |      | [26]                 |
| 26 | <i>Sporobolus nitens</i>                                                                              | PEP-CK | <b>Current study</b>         |      | <b>Current study</b> |
| 27 | <i>Sporobolus paniculatus</i>                                                                         | PEP-CK |                              |      | [26]                 |
| 28 | <i>Sporobolus pectinellus</i>                                                                         | PEP-CK |                              |      | [26]                 |
| 29 | <i>Sporobolus phyllotrichus</i>                                                                       | NAD-ME | <b>Current study</b>         |      | <b>Current study</b> |
| 30 | <i>Sporobolus poiretii</i>                                                                            | PEP-CK | [4]                          | [38] |                      |
| 31 | <i>Sporobolus pulchellus</i>                                                                          | NAD-ME | [16]                         |      | [37]                 |
| 32 | <i>Sporobolus pumilus</i><br>(former <i>Spartina patens</i> )                                         | PEP-CK |                              |      | [25]                 |
| 33 | <i>Sporobolus pyramidalis</i>                                                                         | PEP-CK |                              | [28] |                      |
| 34 | <i>Sporobolus spartinus</i><br>(former <i>Spartina spartinae</i><br>= <i>Spartina argentinensis</i> ) | PEP-CK |                              |      | [25]                 |
| 35 | <i>Sporobolus stapfianus</i>                                                                          | PEP-CK |                              |      | [27]                 |
| 36 | <i>Sporobolus texanus</i>                                                                             | NAD-ME | <b>Current study</b>         |      | <b>Current study</b> |
| 37 | <i>Sporobolus tremulus</i>                                                                            | NAD-ME | <b>Current study</b>         |      | <b>Current study</b> |
| 38 | <i>Sporobolus virginicus</i>                                                                          | NAD-ME |                              |      | [29]                 |
| 39 | <i>Sporobolus wrightii</i>                                                                            | NAD-ME | <b>Current study</b>         |      | <b>Current study</b> |
| 40 | <i>Urochondra setulosa</i>                                                                            | NAD-ME | [12]<br><b>Current study</b> |      | <b>Current study</b> |
| 41 | <i>Zoysia japonica</i>                                                                                | PEP-CK | [4]<br><b>Current study</b>  | [36] | <b>Current study</b> |
| 42 | <i>Zoysia matrella</i>                                                                                | PEP-CK | <b>Current study</b>         |      | <b>Current study</b> |

### References

- Gutierrez, M.; Gracen, V.E.; Edwards, G.E. Biochemical and cytological relationships in C<sub>4</sub> plants. *Planta* **1974**, *119*, 279-300. <https://doi.org/10.1007/BF00388331>
- Hatch, M.D.; Kagawa, T.; Craig, S. Subdivision of C<sub>4</sub>-pathway species based on differing C<sub>4</sub> acid decarboxylating systems and ultrastructural features. *Australian Journal of Plant Physiology* **1975**, *2*, 111-128. <https://doi.org/10.1071/PP9750111>.
- Voznesenskaya, E.V.; Franceschi, V.R.; Chuong, S.D.X.; Edwards, G.E. Functional characterization of phosphoenolpyruvate carboxykinase type C<sub>4</sub> leaf anatomy: Immuno, cytochemical and ultrastructural analyses. *Annals of Botany* **2006**, *98*, 77-91. <https://doi.org/10.1093/aob/mcl096>.
- Koteyeva, N.K.; Voznesenskaya, E.V.; Edwards, G.E. An assessment of the capacity for phosphoenolpyruvate carboxykinase to contribute to C<sub>4</sub> photosynthesis. *Plant Science* **2015**, *235*, 70-80. <http://dx.doi.org/10.1016/j.plantsci.2015.03.004>.
- Prendergast, H.D.V.; Hattersley, P.W.; Stone, N.E. New structural/biochemical associations in leaf blades of C<sub>4</sub> grasses (Poaceae). *Australian Journal of Plant Physiology* **1987**, *14*, 403-420. <https://doi.org/10.1071/PP9870403>.
- Maricle, B.R.; Koteyeva, N.K.; Voznesenskaya, E.V.; Thomasson, J.R.; Edwards, G.E. Diversity in leaf anatomy, and stomatal distribution and conductance, between salt marsh and freshwater species in

- the C<sub>4</sub> genus *Spartina* (Poaceae). *New Phytologist* **2009**, *184*, 216-233.  
<https://doi.org/10.1111/j.1469-8137.2009.02903.x>.
26. Schmidt, M.; König, K.; Müller, J.; Brunken, U.; Zizka, G. Modelling the distribution of photosynthetic types of grasses in Sahelian Burkina Faso with high-resolution satellite data. *Ecotropica* **2011**, *17*, 53-63.
  27. Vecchia, F.D.; El Asmar, T.; Calamassi, R.; Rascio, N.; Vazzana, C. Morphological and ultrastructural aspects of dehydration and rehydration in leaves of *Sporobolus stapfianus*. *Plant Growth Regulation* **1998**, *24*, 219-228. <https://doi.org/10.1023/A:1005853527769>.
  28. Walker, R.P.; Acheson, R.M.; Tecsi, L.I.; Leegood, R.C. Phosphoenolpyruvate carboxykinase in C<sub>4</sub> plants: its role and regulation. *Australian Journal of Plant Physiology* **1997**, *24*, 459-468.  
<https://doi.org/10.1071/PP97007>.
  29. Kemp, P.R.; Cunningham, G.L.; Adams, H.P. Specialization of mesophyll morphology in relation to C<sub>4</sub> photosynthesis in the Poaceae. *American Journal of Botany* **1983**, *70*, 349-354.  
<https://doi.org/10.2307/2443242>.
  36. Christin, P.-A.; Petitpierre, B.; Salamin, N.; Büchi, L.; Besnard, G. Evolution of C<sub>4</sub> phosphoenolpyruvate carboxykinase in grasses, from genotype to phenotype. *Molecular Biology and Evolution* **2009**, *26*, 357-365. <https://doi.org/10.1093/molbev/msn255>.
  37. Prendergast, H.D.V.; Hattersley, P.W. Australian C<sub>4</sub> grasses (Poaceae): leaf blade anatomical features in relation to C<sub>4</sub> acid decarboxylation types. *Australian Journal of Botany* **1987**, *35*, 355-382.  
<https://doi.org/10.1071/BT9870355>.
  38. Edwards, G.E.; Kanai, R.; Black, C.C. Phosphoenolpyruvate carboxykinase in leaves of certain plants which fix CO<sub>2</sub> by the C<sub>4</sub>-dicarboxylic acid cycle of photosynthesis. *Biochemical and Biophysical Research Communications* **1971**, *45*, 278-285. [https://doi.org/10.1016/0006-291X\(71\)90814-X](https://doi.org/10.1016/0006-291X(71)90814-X).

Supplementary Table S4. Sporobolus accessions used for phylogeny reconstruction

| NCBI nucleotide                                                                        | RpL32 and rpl32-trnL | ndhA       | rps16      | rps16-trnK |
|----------------------------------------------------------------------------------------|----------------------|------------|------------|------------|
| <i>Eleusine indica</i> voucher Peterson 21362, Saarela & Flores Villegas               | GU359797.1           | GU359473.1 | GU360472.1 | GU360496.1 |
| <i>Eragrostiella leioptera</i> voucher Chand 7961                                      | GU359827.1           | GU359486.1 | JQ345280.1 | GU360529.1 |
| <i>Gymnopogon grandiflorus</i> voucher Peterson 16642 & Refulio-Rodriguez              | GU359816.1           | GU359436.1 | GU360383.1 | GU360581.1 |
| <i>Sporobolus africanus</i> voucher Peterson 24024                                     | KM010735             | KM010567   | KM010955   | KM011160   |
| <i>Sporobolus africanus</i> voucher Peterson 24121                                     | KM010736             | KM010568   | KM010956   | KM011161   |
| <i>Sporobolus airoides</i> subsp. <i>airoides</i> voucher Peterson 24587 & Romaschenko | KM010738             | KM010570   | KM010958   | KM011163   |
| <i>Sporobolus airoides</i> subsp. <i>airoides</i> voucher Peterson 24853 & Romaschenko | KM010739             | KM010571   | KM010959   | KM011164   |
| <i>Sporobolus airoides</i> voucher Peterson 10002, Annable & Valdes-Reyna              | KM010737             | KM010569   | KM010957   | KM011162   |
| <i>Sporobolus alterniflorus</i> voucher Naylov 236                                     | KM010701.1           | KM010540.1 | KM010924.1 | KM011128.1 |
| <i>Sporobolus anglicus</i> voucher Matthews s.n.                                       | KM010702             | KM010541   | KM010925   | KM011129   |
| <i>Sporobolus anglicus</i> voucher Williams 2004-1                                     | KM010703             | KM010542   | KM010926   | KM011130   |
| <i>Sporobolus anglicus</i> voucher Williams 2004-2                                     | KM010704             | KM010543   | KM010927   | KM011131   |
| <i>Sporobolus bakeri</i> voucher Killip 44361                                          | KM010705.1           | KM010544.1 | KM010928.1 | KM011132.1 |
| <i>Sporobolus carolii</i> voucher Saarela 1626, Peterson & Soreng                      | KM010759.1           | KM010584.1 | KM010976.1 | -          |
| <i>Sporobolus carolii</i> voucher Speak 1915                                           | KM010760.1           | KM010585.1 | KM010977.1 | KM011183.1 |
| <i>Sporobolus contractus</i> voucher Perez 196                                         | KM010772             | -          | KM010988   | KM011194   |
| <i>Sporobolus creber</i> voucher Brown 498                                             | KM010779.1           | KM010600.1 | KM010994.1 | KM011200.1 |
| <i>Sporobolus cryptandrus</i> voucher Peterson 24454 & Romaschenko                     | KM010780             | KM010601   | KM010995   | KM011201   |
| <i>Sporobolus cryptandrus</i> voucher Peterson 24485 & Romaschenko                     | KM010781             | KM010602   | KM010996   | KM011202   |
| <i>Sporobolus cynosuroides</i> voucher Fisher 33123                                    | KM010708.1           | KM010545.1 | KM010930.1 | KM011135.1 |
| <i>Sporobolus cynosuroides</i> voucher Hill 15630                                      | KM010709.1           | KM010546.1 | KM010931.1 | KM011136.1 |
| <i>Sporobolus densiflorus</i> voucher Clayton 4723 & Eiten                             | KM010717.1           | KM010553.1 | KM010939.1 | KM011144.1 |
| <i>Sporobolus densiflorus</i> voucher Lomer 5723                                       | -                    | KM010547.1 | KM010932.1 | KM011137.1 |
| <i>Sporobolus festivus</i> voucher Peterson 23853                                      | KM010791             | KM010608   | KM011004   | KM011209   |
| <i>Sporobolus fimbriatus</i> voucher Peterson 24206, Soreng & Romaschenko              | KM010793             | KM010609   | KM011005   | KM011210   |
| <i>Sporobolus fimbriatus</i> voucher Peterson 24241, Soreng & Romaschenko              | KM010794             | KM010610   | KM011006   | KM011211   |
| <i>Sporobolus fimbriatus</i> voucher Peterson 24280, Soreng & Romaschenko              | -                    | KM010611   | KM011007   | KM011212   |
| <i>Sporobolus foliosus</i> voucher Reeder 6652 & Reeder                                | KM010711.1           | KM010548.1 | KM010933.1 | KM011138.1 |
| <i>Sporobolus giganteus</i> voucher Page 2628                                          | KM010800             | -          | KM011011   | KM011216   |
| <i>Sporobolus helvolus</i> voucher Laegaard 17063 & Traore                             | KM010802             | -          | KM011013   | KM011217   |

|                                                                                           |            |            |            |            |
|-------------------------------------------------------------------------------------------|------------|------------|------------|------------|
| Sporobolus helvolus voucher Peterson 24217, Soreng & Romaschenko                          | KM010803   | KM010615   | KM011014   | KM011218   |
| Sporobolus hookerianus voucher Hendrickson 41                                             | KM010712   | KM010549   | KM010934   | KM011139   |
| Sporobolus hookerianus voucher Scoggan 15626                                              | KM010714   | KM010551   | KM010936   | KM011141   |
| Sporobolus indicus var. pyramidalis voucher Peterson 24150                                | KM010858   | KM010646   | KM011062   | KM011261   |
| Sporobolus indicus var. pyramidalis voucher Peterson 24150, Soreng & Romaschenko          | KM010858.1 | KM010646.1 | -          | KM011261.1 |
| Sporobolus indicus var. pyramidalis voucher Senaratne E6082-11                            | KM010859   | KM010647   | KM011063   | KM011262   |
| Sporobolus indicus var. pyramidalis voucher Senaratne E6082-11                            | KM010859.1 | KM010647.1 | KM011063.1 | KM011262.1 |
| Sporobolus indicus voucher Peterson 22025 & Saarela                                       | GU359913   | GU359504   | GU360355   | GU360630   |
| Sporobolus indicus voucher Peterson 7337                                                  | KM010806   | KM010617   | KM011017   | KM011221   |
| Sporobolus ioclados voucher Smook 5920                                                    | KM010808   | KM010619   | KM011019   | KM011223   |
| Sporobolus jacquemontii voucher Estrada 18964 et al.                                      | KM010809   | KM010620   | KM011020   | KM011224   |
| Sporobolus jacquemontii voucher Peterson 15902 & Valdes-Reyna                             | KM010810   | KM010621   | KM011021   | KM011225   |
| Sporobolus maritimus voucher Fernandez Casas 5537, Castroviejo, Munoz Garmendia & Susanna | KM010715.1 | KM010552.1 | KM010937.1 | KM011142.1 |
| Sporobolus maritimus voucher Marchant s.n.                                                | KM010716.1 | -          | KM010938.1 | KM011143.1 |
| Sporobolus michauxianus voucher Cooperrider s.n.                                          | KM010722.1 | KM010556.1 | KM010943.1 | KM011149.1 |
| Sporobolus michauxianus voucher Dirig 2812                                                | KM010723.1 | KM010557.1 | KM010944.1 | KM011150.1 |
| Sporobolus microprotus voucher Laegaard 17894 & Traore                                    | KM010824   | KM010629   | KM011035   | KM011235   |
| Sporobolus microprotus voucher Laegaard 17894 & Traore                                    | KM010824.1 | KM010629.1 | KM011035.1 | -          |
| Sporobolus nitens voucher Laegaard 15893                                                  | KM010837   | KM010634   | KM011043   | KM011246   |
| Sporobolus pectinellus voucher Peterson 23978, Soreng & Romaschenko                       | KM010848.1 | KM010641.1 | KM011052.1 | KM011252.1 |
| Sporobolus phyllotrichus voucher Greenway 11844 & Kanuri                                  | KM010851   | -          | KM011055   | -          |
| Sporobolus pumilus voucher Dutton 2536                                                    | KM010719.1 | KM010554.1 | KM010940.1 | KM011146.1 |
| Sporobolus pumilus voucher Peterson 24435 & Romaschenko                                   | KM010720.1 | -          | KM010941.1 | KM011147.1 |
| Sporobolus pumilus voucher Shchepanek 6426 & Dugal                                        | KM010721.1 | KM010555.1 | KM010942.1 | KM011148.1 |
| Sporobolus spartinus voucher Reeder 4568 & C. Reeder                                      | KM010724.1 | KM010558.1 | KM010945.1 | KM011151.1 |
| Sporobolus spartinus voucher Villarreal 3201                                              | KM010725.1 | KM010559.1 | KM010946.1 | KM011152.1 |
| Sporobolus stapfianus voucher Laegaard 15939                                              | KM010882.1 | -          | KM011084.1 | KM011283.1 |
| Sporobolus texanus voucher Churchill 2645 & Kaul                                          | GU359908   | GU359509   | GU360376   | GU360626   |
| Sporobolus virginicus voucher Peterson 23820, Soreng & Romaschenko                        | KM010900.1 | -          | KM011102.1 | KM011299.1 |
| Sporobolus virginicus voucher US:Peterson 15683 & Soreng                                  | GU359892.1 | GU359502.1 | GU360362.1 | GU360610.1 |
| Sporobolus wrightii voucher Peterson 10638 & Annable                                      | KM010902   | KM010677   | KM011104   | KM011301   |
| Sporobolus wrightii voucher Peterson 19841 & Lara-Contreras                               | GU359906   | GU359511   | GU360348   | GU360624   |
| Sporobolus wrightii voucher Peterson 24841 & Romaschenko                                  | KM010903   | KM010678   | KM011105   | KM011302   |

|                                                       |            |            |            |            |
|-------------------------------------------------------|------------|------------|------------|------------|
| Tripogon multiflorus voucher Spellenberg 7441         | JQ345360.1 | JQ345232.1 | JQ345315.1 | JQ345274.1 |
| Tripogon trifidus voucher Laegaard 21668 & Norsangsri | KP873641.1 | KP873957.1 | KP874094.1 | KP873822.1 |
| Urochondra setulosa voucher Bailey 10868              | KM010906.1 | KM010679.1 | KM011106.1 | KM011305.1 |
| Urochondra setulosa voucher Baldini s.n.              | KM010907.1 | KM010680.1 | KM011107.1 | KM011306.1 |
| Urochondra setulosa voucher Inckennon 181             | KM010908.1 | KM010681.1 | KM011108.1 | KM011307.1 |
| Urochondra setulosa voucher Rechinger 27496           | KM010909.1 | KM010682.1 | KM011109.1 | KM011308.1 |
| Zoysia japonica voucher US:Kuragadake s.n.            | GU359923.1 | GU359547.1 | -          | GU360643.1 |
| Zoysia macrantha subsp. walshii voucher US:Loch 435   | GU359922.1 | GU359548.1 | GU360345   | GU360642.1 |
| Zoysia macrantha voucher US:Soreng 5913 & Peterson    | GU360017.1 | GU359558.1 | GU360346.1 | GU360641.1 |
